# Supplementary material for: Genetic Manipulation of Palmitoylethanolamide Production and Inactivation in Saccharomyces cerevisiae
Source: PLOS journal article supplement (doi:10.1371/journal.pone.0005942), 2009-06-15
Supplement: S1 (10.1371/journal.pone.0005942.s001) [file journal.pone.0005942.s001]

## Supplemental Figure 1

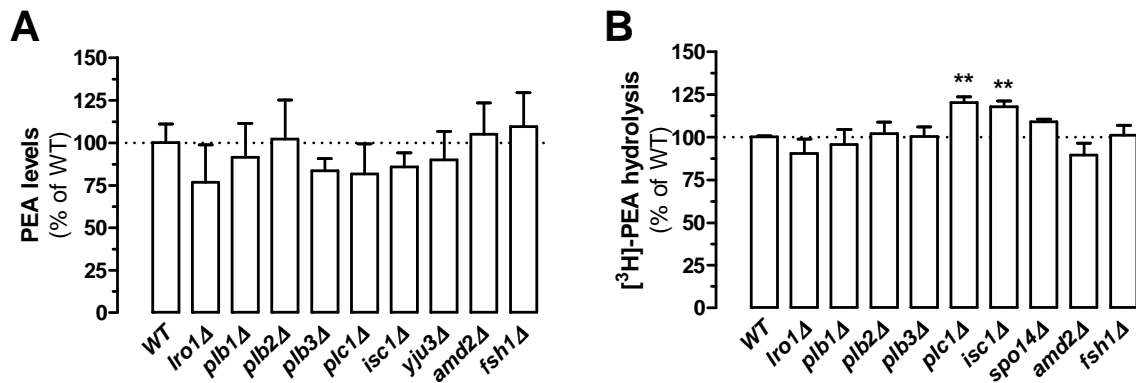

### Genetic Modification of PEA Production and Inactivation in Yeast

PEA levels were measured by CI-GC-MS (A) and [<sup>3</sup>H]-PEA hydrolysis (B) in yeast gene deletion strains compared to those found in a wild-type strain (WT). The following gene-deleted strains were assayed:  $\Delta iro1$ ,  $\Delta plb1$ ,  $\Delta plb2$ ,  $\Delta plb3$ ,  $\Delta plc1$ ,  $\Delta isc1$ ,  $\Delta spo14$ ,  $\Delta yju3$ ,  $\Delta amd2$  and  $\Delta fsh1$  (Table 1). Values are the mean  $\pm$  SEM of four to five experiments performed in duplicate (A) and of 3 experiments in duplicate (B), and are expressed as percentage of wild-type yeast. \*  $P < 0.05$  and \*\*  $P < 0.01$  compared to wild-type yeast (ANOVA one-way, Dunnett's post test).
